# Supplementary material for: Magnetic resonance imaging (MRI) and clinical features of different parts of the pancreas involved in acute pancreatitis: a cross-sectional study
Source: PubMed Central journal article supplement — Quant Imaging Med Surg. 2024 Oct 28;14(12):8361–73. doi: 10.21037/qims-24-693 (PMC11651986; doi:10.21037/qims-24-693), 2024-10-28
Supplement: qims-14-12-8361-supplementary.pdf [file qims-14-12-8361-supplementary.pdf]

**Table S1** 3.0-T MR scan parameters (MR750, GE Medical Systems, Waukesha, WI, USA)

| Scanning sequences | TR (ms)     | TE (ms)   | Section thickness (mm) | Intersection gap (mm) | Matrix  | FOV (cm) |
|--------------------|-------------|-----------|------------------------|-----------------------|---------|----------|
| Ax SSFSE T2WI      | 4,500–6,000 | 90–120    | 6                      | 1                     | 320×256 | 34×34    |
| Cor SSFSE T2WI     | 4,500–6,000 | 90–120    | 5                      | 1                     | 384×256 | 36×36    |
| Ax FRFSE fs-T2WI   | 2,500–3,000 | 90–120    | 6                      | 1                     | 384×384 | 34×34    |
| Ax 3D LAVA-Flex    | 3.6–4.4     | 1.7–1.9   | 5.2                    | 0                     | 224×192 | 36×36    |
| MRCP               | 4,000–5,000 | 900–1,000 | 50                     | 40–50                 | 384×256 | 34×34    |
| T1 C+*             | 3.6–4.4     | 1.7–1.9   | 5.2                    | 0                     | 224×192 | 36×36    |

MR, magnetic resonance; TR, repetition time; TE, echo time; FOV, field of view; Ax SSFSE T2WI, axial single-shot fast spin-echo T2-weighted imaging; Cor SSFSE T2WI, coronal single-shot fast spin-echo T2-weighted imaging; Ax FRFSE fs-T2WI, axial fast recovery fast spin-echo T2-weighted imaging; Ax 3D LAVA-Flex, three-dimensional liver acquisitions with volume acceleration flex; MRCP, magnetic resonance cholangiopancreatography.

**Table S2** 3.0-T MR scan parameters (uMR790, United Imaging, Shanghai, China)

| Scanning sequences | TR (ms)   | TE (ms) | Section thickness (mm) | Intersection gap (mm) | Matrix  | FOV (cm)A |
|--------------------|-----------|---------|------------------------|-----------------------|---------|-----------|
| Ax SSFSE T2W       | 8000–9000 | 90–120  | 6                      | 1                     | 256×171 | 38×30     |
| Cor SSFSE T2W      | 8000–9000 | 90–120  | 5                      | 1                     | 256×217 | 38×38     |
| Ax FRFSE fs-T2W    | 2500–3000 | 90–120  | 6.500                  | 1                     | 304×192 | 38×30     |
| Ax 3D LAVA-Flex    | 3–4       | 1–2     | 3                      | 0                     | 304×205 | 40×30     |
| MRCP               | 5000–6000 | 700–800 | 60                     | 40–50                 | 256×153 | 30×30     |
| T1 C+*             | 3–4       | 1–2     | 3                      | 0                     | 368×276 | 40×30     |

MR, magnetic resonance; TR, repetition time; TE, echo time; FOV, field of view; Ax SSFSE T2WI, axial single-shot fast spin-echo T2-weighted imaging; Cor SSFSE T2WI, coronal single-shot fast spin-echo T2-weighted imaging; Ax FRFSE fs-T2WI, axial fast recovery fast spin-echo T2-weighted imaging; Ax 3D LAVA-Flex, three-dimensional liver acquisitions with volume acceleration flex; MRCP, magnetic resonance cholangiopancreatography.
